# Supplementary material for: An enzymatic protocol for absolute quantification of analogues: application to specific protopanoxadiol-type ginsenosides
Source: Royal Society of Chemistry journal article supplement (doi:10.1039/c5gc00091b), 2015-01-01
Supplement: c5gc00091b1.pdf [file c5gc00091b1.pdf]

## An enzymatic protocol for absolute quantification of analogues: application to specific protopanaxadiol-type ginsenosides

Chang-Jiang-Sheng Lai, ‡ Ting Tan, ‡ Su-Ling Zeng, Lin-Ru Xu, Lian-Wen Qi\*, E-Hu Liu\* and Ping Li\*

State Key Laboratory of Natural Medicines (China Pharmaceutical University), No.24  
Tongjia lane, Nanjing 210009, China

\* Corresponding authors:

E-mail addresses: liping2004@126.com (P. Li), liuehu2011@163.com (E.-H. Liu).

‡ These authors contributed equally to the paper

### Electronic Supplementary Information

|                                                                                                                                                                                                                                                                                                                           |          |
|---------------------------------------------------------------------------------------------------------------------------------------------------------------------------------------------------------------------------------------------------------------------------------------------------------------------------|----------|
| <b>1. Relative response factors (<i>F</i>) calculation</b>                                                                                                                                                                                                                                                                | <b>2</b> |
| <b>2. Supplementary Figures:</b>                                                                                                                                                                                                                                                                                          | <b>4</b> |
| <b>Fig. S1</b> The protocol for simultaneous quantification of analogues in complex extract.                                                                                                                                                                                                                              | <b>4</b> |
| <b>Fig. S2</b> The structure of GRb <sub>1</sub> and the marked hydroxyl group in the skeleton of protopanaxadiol (PPD) and the side sugar moieties.                                                                                                                                                                      | <b>5</b> |
| <b>Fig. S3</b> Glucose assay kits analysis.                                                                                                                                                                                                                                                                               | <b>6</b> |
| <b>Fig. S4</b> The [M-H] <sup>-</sup> (a) and [M+HCOO] <sup>-</sup> (b) ions of the C-25, 26 hydroxylated side products were not detected.                                                                                                                                                                                | <b>7</b> |
| <b>Fig. S5</b> The mass spectrometry response saturation for GRb <sub>1</sub> (a) and GRd (b).                                                                                                                                                                                                                            | <b>8</b> |
| <b>Fig. S6</b> The chromatographic spectra of the chemical standards and <i>Panax notoginseng</i> determined by the LC-MS. The compounds eluted at 9.71 min ( <i>m/z</i> 991.5, GRe) and 14.62 min ( <i>m/z</i> 829.5, Isomer of ginsenoside Rg <sub>2</sub> , Iso-GRg <sub>2</sub> ) were typical PPT-type ginsenosides. | <b>9</b> |

### Relative response factors ( $F$ ) calculation

The enzymatic hydrolysis coupled with the CCMM could be applied for calculating the  $F$  for the analytes of interest. The detailed procedures were according to the following equations. In LC-ESI/MS analysis, the calibration curves could be described as follows:

$$y = ax + b \quad (1)$$

Where  $y$  is the response area ratio for the interested analyte to IS, and  $x$  is the mass concentration. The  $x$  could be calculated as follows:

$$x = n \times M \quad (2)$$

Where  $n$  and  $M$  is the actual molar concentration and molar mass, respectively.  $n$  could be directly determined by the enzymatic hydrolysis.  $F$  was typically defined as the following equation<sup>20</sup>:

$$F = a_1/a_2 \quad (3)$$

Where  $a_1$  and  $a_2$  are the slopes of the CCAC for the analytes of interest. After concentration calibration, the CCAC was replaced by the CCMM to calculate the value of  $F$ , which was expressed as the Eq. 4:

$$F = [a'_1/(x_1/R_1)]/[a'_2/(x_2/R_2)] \quad (4)$$

Where  $a'_1$  and  $a'_2$  are the slopes of the CCMM for the interested analytes.  $x_1/R_1$  and  $x_2/R_2$  are the actual mass concentration for analytes in matrix materials. Thus, the represented form of Eq. 4 is the same to the Eq. 3.  $x_1$  and  $x_2$  are their mass concentrations.  $R_1$  and  $R_2$  are the collections recoveries for analytes. The collection recovery ( $R$ ) could be calculated by the following equation based on the modified

NSRE<sup>5</sup>:

$$R = x_d/x_t = [(y'_d - b')/a'] / (m \times C_0 v_0/v_R) = (y'_d - b') / (m \times a') \quad (5)$$

Where  $x_t$  and  $x_d$  is the theoretical crude extract concentration and the detected crude extract concentration for collected interested analytes,<sup>5,22</sup> respectively. The  $y'_d$ ,  $b'$  and  $a'$  is the detected response ratios as well as the slopes and intercepts of their corresponding CCMM, respectively.  $C_0$  is the original Sanqi extract concentration (100 mg mL<sup>-1</sup>),  $v_0$  is the injection volume for collection (20  $\mu$ L) and  $v_R$  is reconstituted volume (2000  $\mu$ L). The  $m$  is the dilution folds. When the determined  $R$  and  $x$  were inserted in Eq. 4,  $F$  could be successfully calculated.

## Supplementary Figures

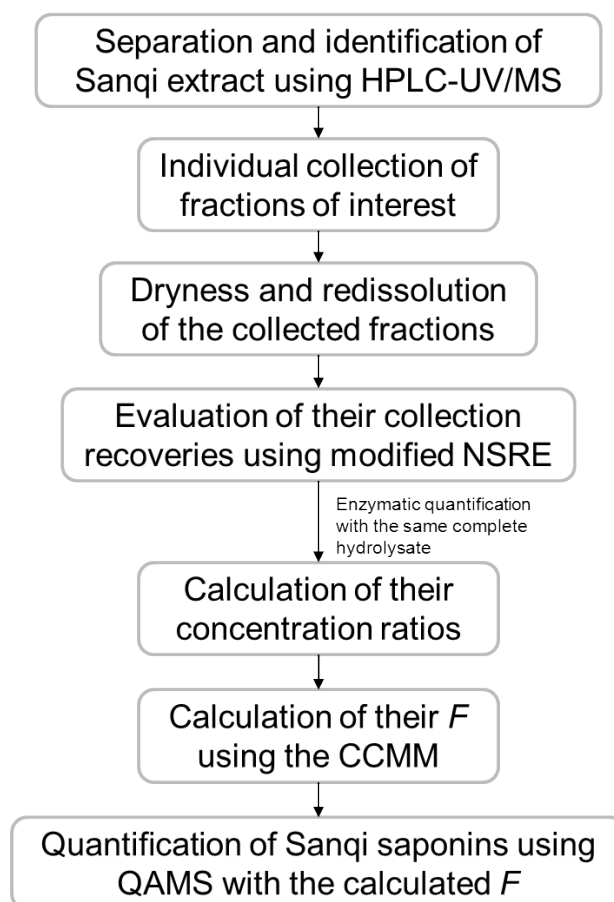

**Fig. S1** The protocol for simultaneous quantification of analogues in complex extract. The significant advantage of this protocol is only using minimal collected extract fractions and the complete hydrolyte. The relative response factors ( $F$ ) calculations depended on the enzymatic hydrolysis, the modified non-standard recovery evaluation (NSRE) strategy and the calibration curves matrix materials (CCMM). The economical method of the quantitative analysis of multi-components with a single marker (QAMS) coupled with the calculated  $F$  was employed for absolute quantification of specific protopanaxatriol type ginsenosides in Sanqi (*Panax notoginseng*) extract.

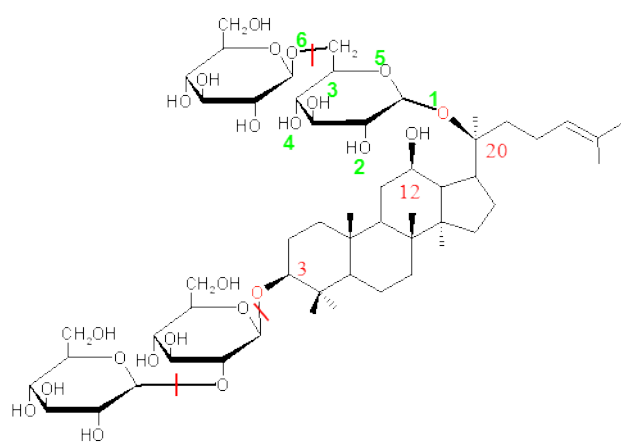

**Fig. S2** The structure of GRb<sub>1</sub> and the marked hydroxyl group in the skeleton of protoanaxadiol (PPD) and the side sugar moieties.

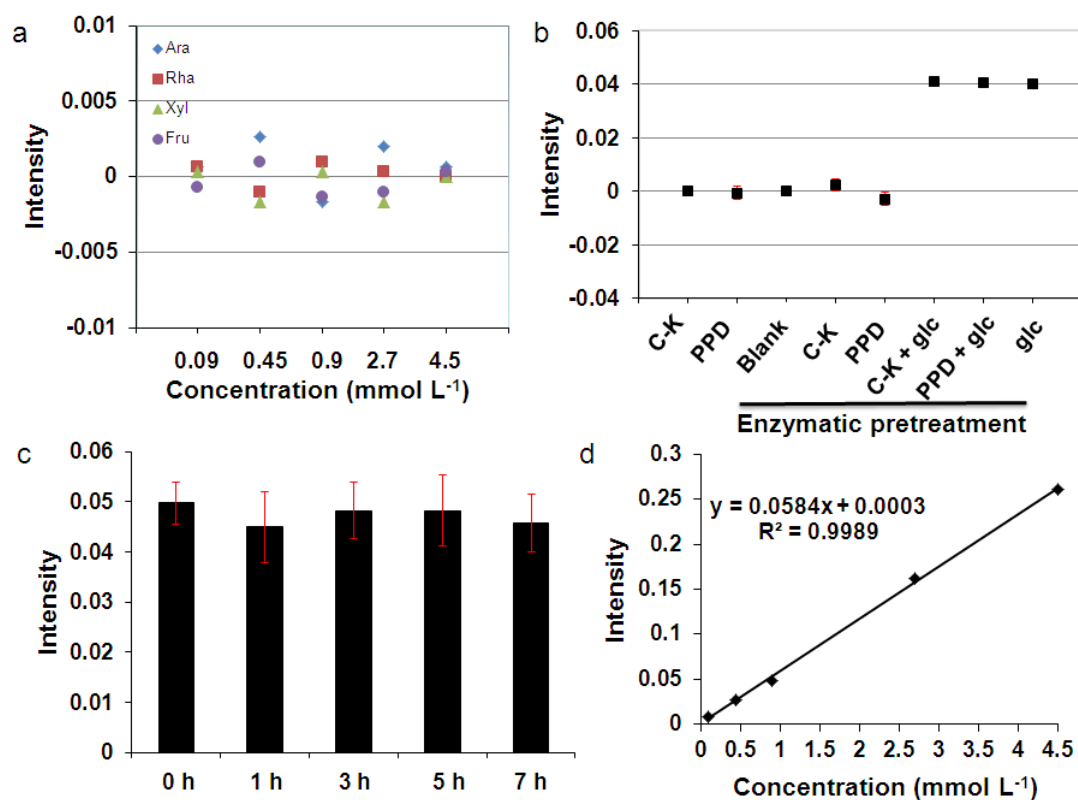

**Fig. S3** Glucose assay kits analysis. (a) The selectivity of this method for glucose, rather than arabinose (Ara), rhamnose (Rha), xylose (Xyl) and fructose (Fru); (b) the assay was not disturbed by the other hydrolysates, including compound K (C-K) and protopanoxadiol (PPD); (c) the stability of glucose; (d) the calibration curve of glucose.

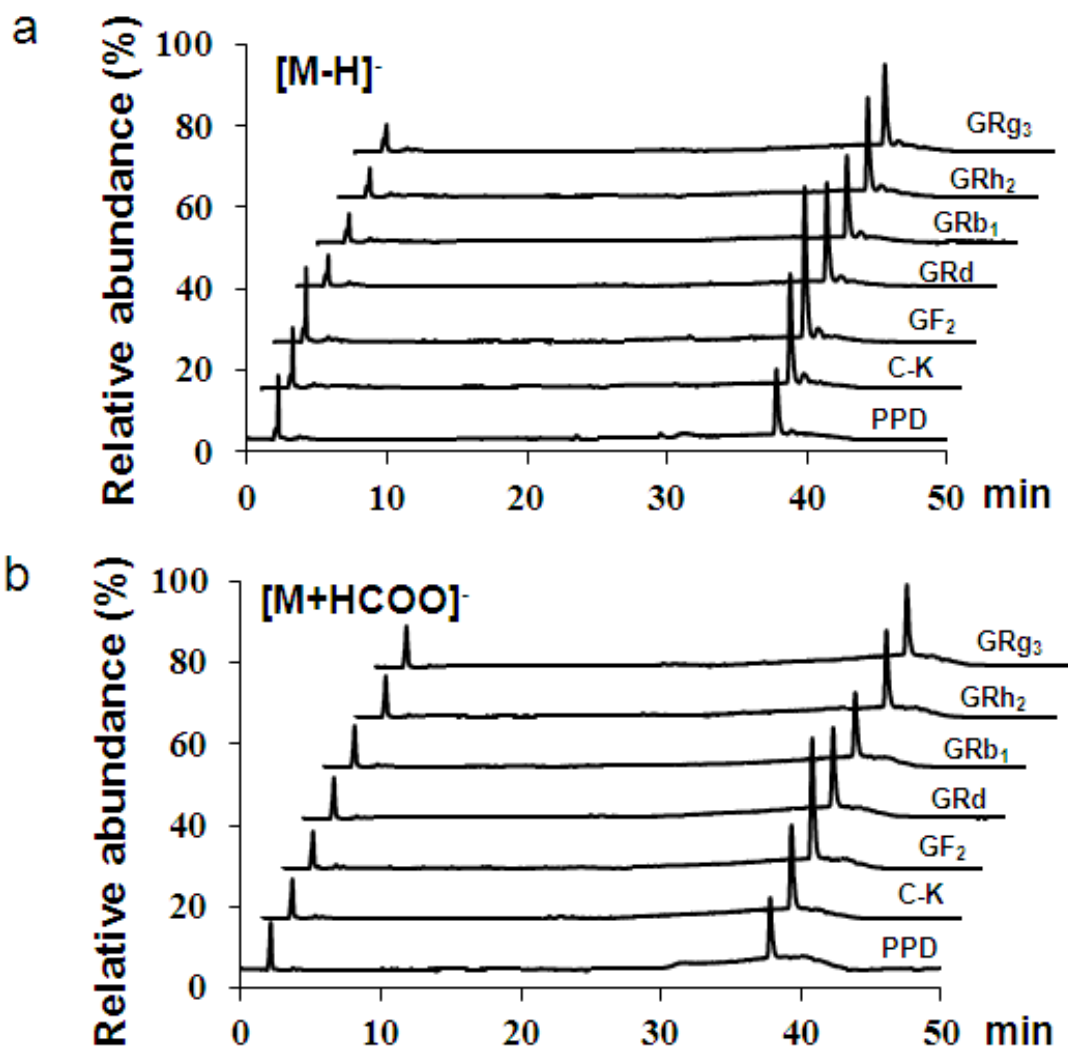

Fig. S4 The  $[M-H]^-$  (a) and  $[M+HCOO]^-$  (b) ions of the C-25, 26 hydroxylated side products were not detected.

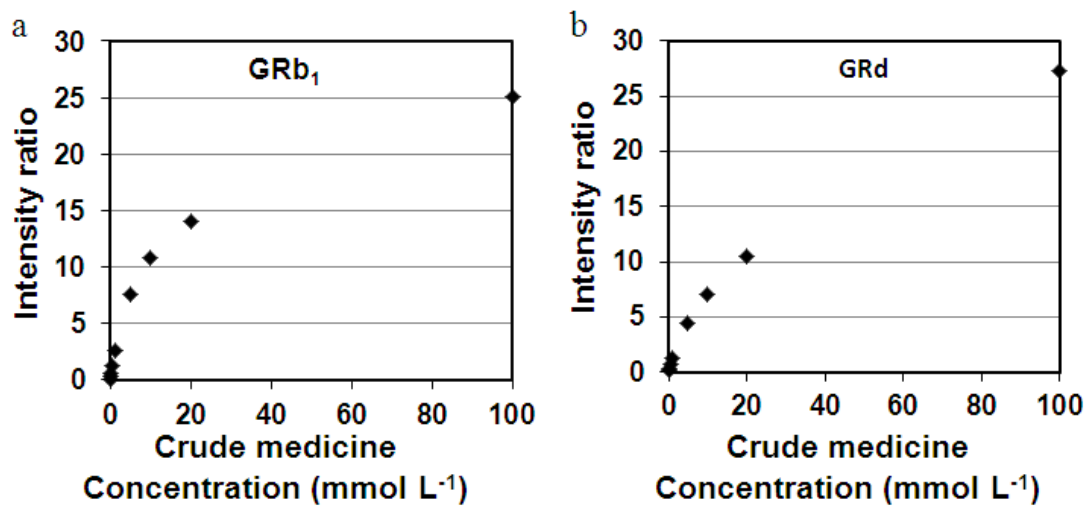

Fig. S5 The mass spectrometry response saturation for GRb<sub>1</sub> (a) and GRd (b).



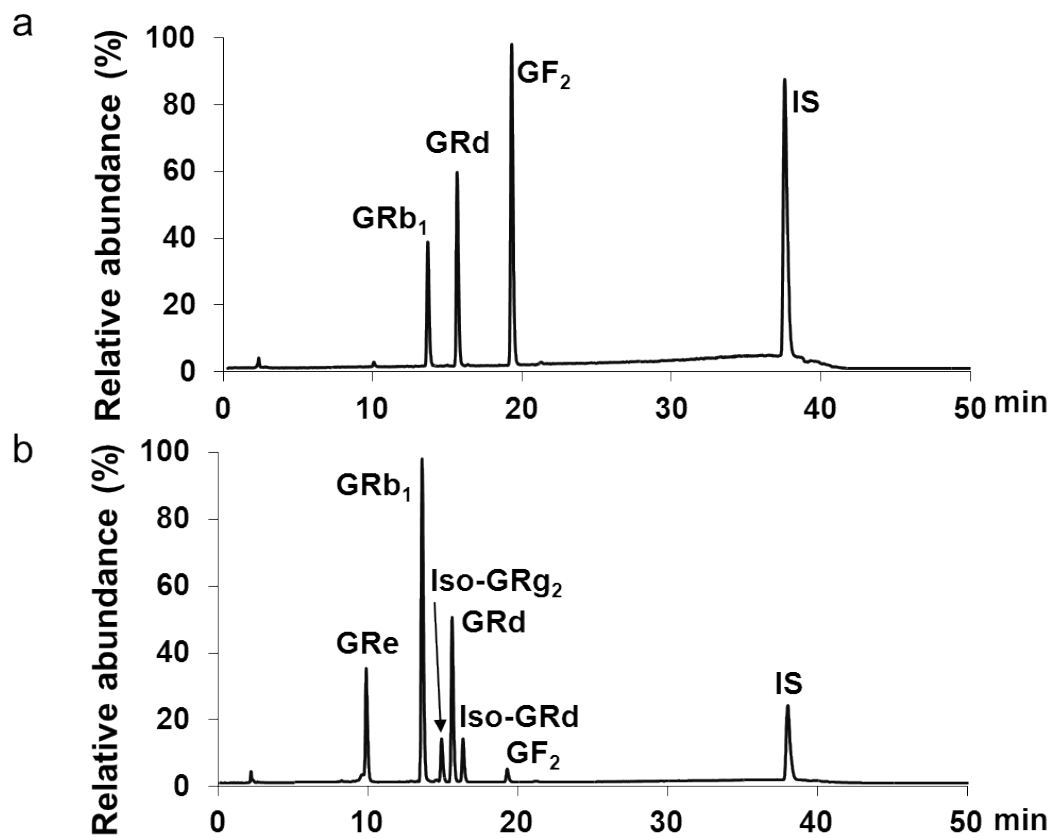

**Fig. S6** The chromatographic spectra of the chemical standards and *Panax notoginseng* determined by the LC-MS. The compounds eluted at 9.71 min ( $m/z$  991.5, GRe) and 14.62 min ( $m/z$  829.5, Isomer of ginsenoside Rg<sub>2</sub>, Iso-GRg<sub>2</sub>) were typical PPT-type ginsenosides.
